# Supplementary material for: Inkjet-printed Ce-doped SnOx electron transport layer for improved performance of planar perovskite solar cells
Source: Royal Society of Chemistry journal article supplement (doi:10.1039/d4ma00094c), 2024-01-01
Supplement: d4ma00094c1.pdf [file d4ma00094c1.pdf]

## Supplementary information

# **Inkjet-printed Ce-doped SnO<sub>x</sub> electron transport layer for improved performance of planar perovskite solar cells**

*Dongli Lu*<sup>1</sup>, *Mahboubeh Jamshidi*<sup>2</sup>, *Chaochao Dun*<sup>3</sup>, *Jeffrey J. Urban*<sup>3</sup>, *James M. Gardner*<sup>2</sup>,  
*and Liubov Belova*<sup>1, \*</sup>

<sup>1</sup>Department of Materials Science and Engineering, KTH Royal Institute of Technology, 10044 Stockholm, Sweden. E-mail: lyuba@kth.se

<sup>2</sup>Department of Chemistry, Applied Physical Chemistry, KTH Royal Institute of Technology, 10044 Stockholm, Sweden.

<sup>3</sup>The Molecular Foundry, Lawrence Berkeley National Laboratory, Berkeley, CA 94720, United States.

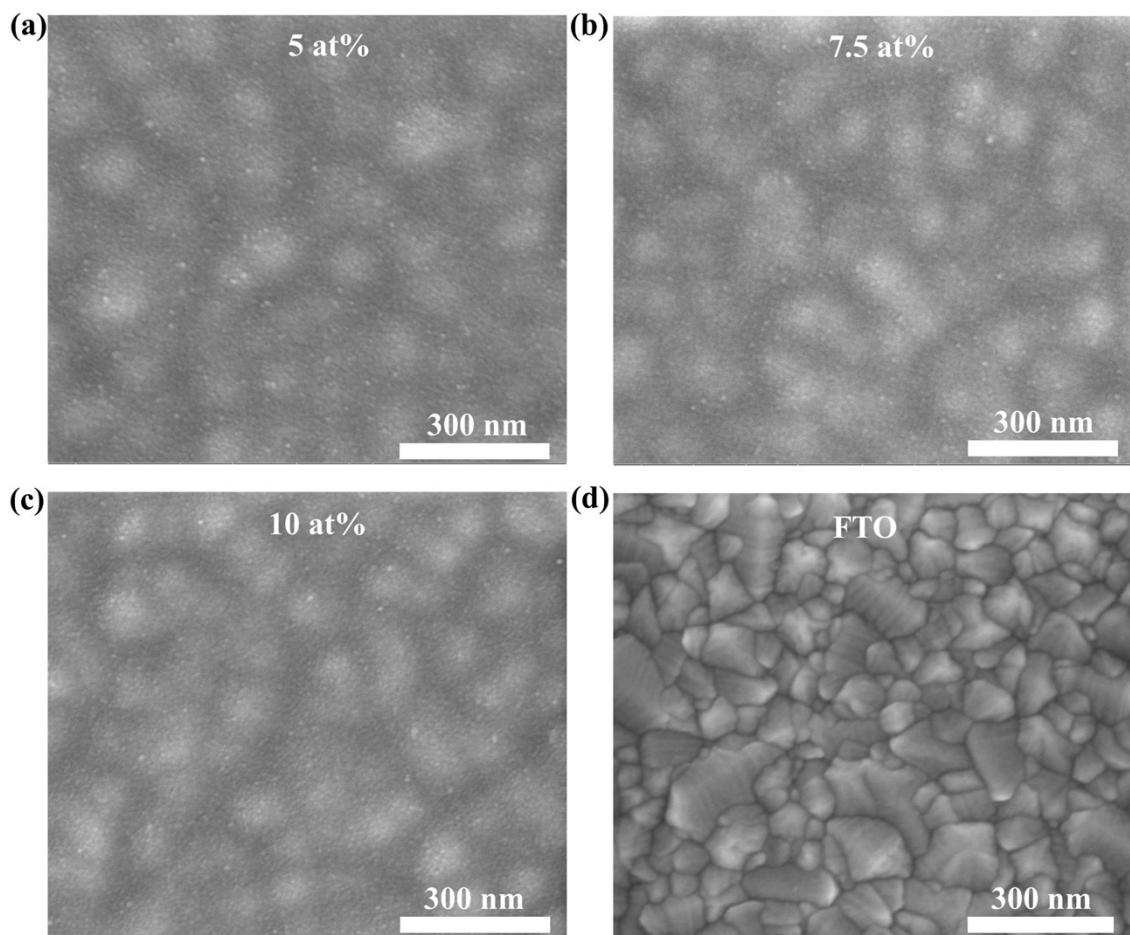

**Figure S1.** (a-c) Top-view SEM images of inkjet-printed Ce-doped SnO<sub>x</sub> thin films at various doping levels. (d) Bare FTO is shown as a reference. Note that the larger 100 nm-scale structures are the large grains of the FTO substrate under the SnO<sub>x</sub> films.

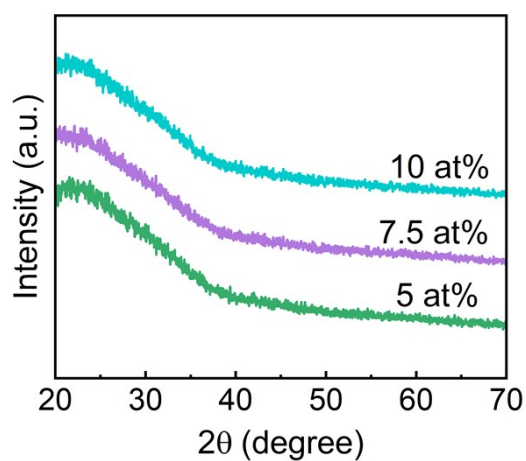

**Figure S2.** XRD spectra of inkjet-printed Ce-doped SnO<sub>x</sub> thin films at various Ce doping levels.

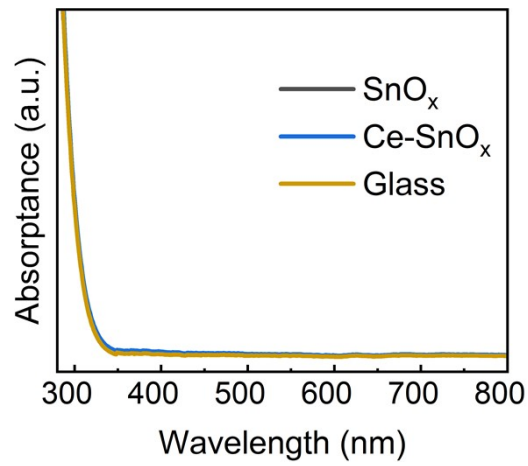

**Figure S3.** Absorbance of SnO<sub>x</sub> and 2.5 at% Ce-SnO<sub>x</sub> thin films on glass substrates.

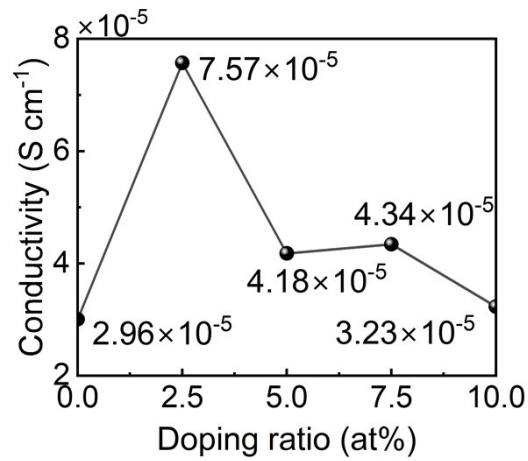

**Figure S4.** Conductivity of pristine SnO<sub>x</sub> and Ce-doped SnO<sub>x</sub> thin films with various Ce doping contents.

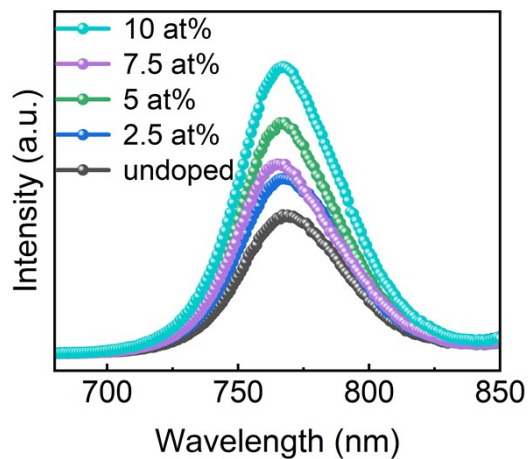

**Figure S5.** PL spectra of the perovskite films deposited on pristine  $\text{SnO}_x$  and Ce-doped  $\text{SnO}_x$ .

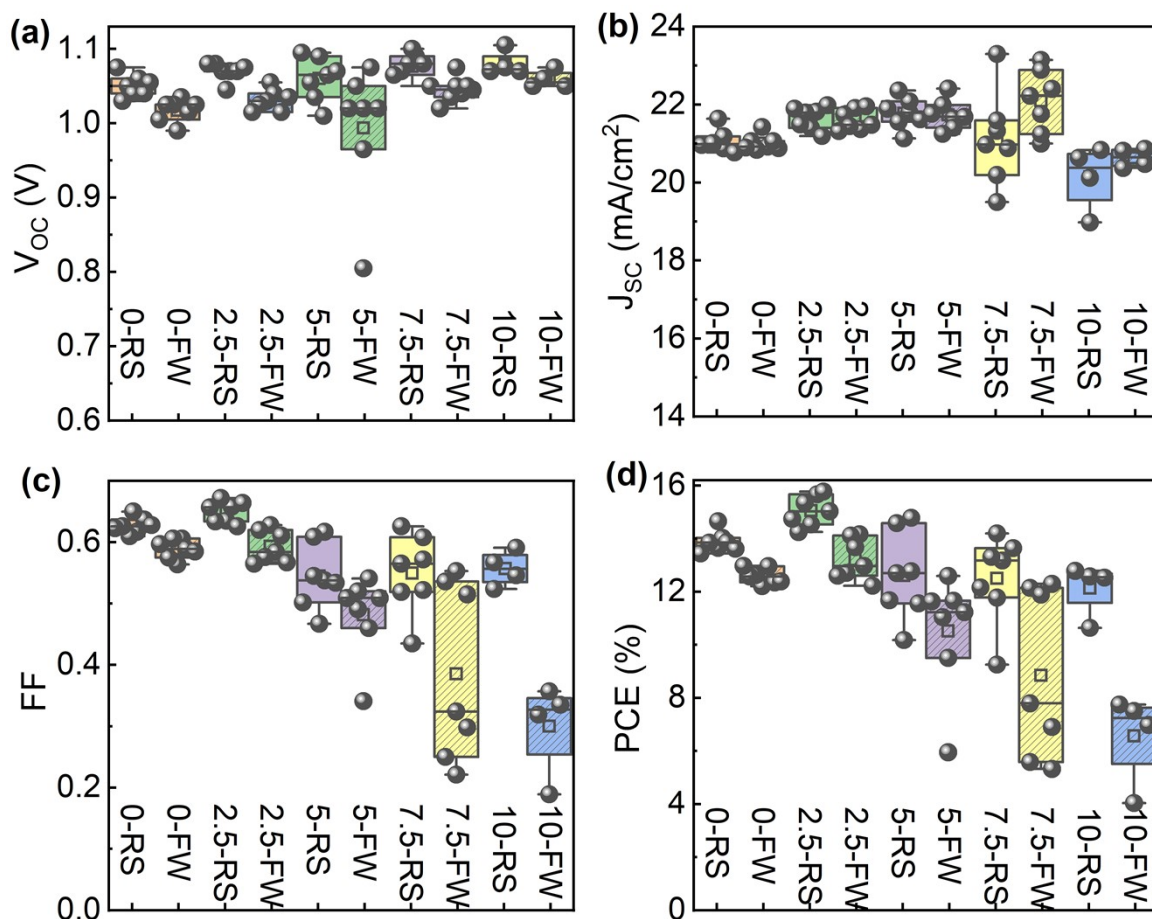

**Figure S6.** Distribution of photovoltaic parameters of PSCs based on inkjet-printed pristine  $\text{SnO}_x$  and Ce-doped  $\text{SnO}_x$  at various doping concentrations.

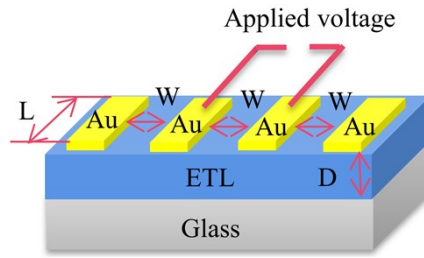

**Figure S7.** The device architecture for measuring the conductivity of ETLs.

The electrical conductivity of ETLs was measured using a two-probe method [1]. As shown in **Figure S7**, the conductivity ( $\sigma$ ) is determined using the equation:

$$\sigma = \frac{J}{E} = \frac{W}{R \times D \times L}$$

$$J = \frac{I}{D \times L}, E = \frac{V}{W}$$

where R is the resistance calculated from a current-voltage (I-V) curve using linear voltage sweeps, D is the thickness of the ETL, W and L are the channel width and length of 2 mm and 10 mm, respectively. The eventual estimated conductivity was an average value based on data obtained from two devices.

**Table S1.** Peak deconvolution of the O 1s XPS spectra of pristine SnO<sub>x</sub> and 2.5 at% Ce-doped SnO<sub>x</sub>.

| Sample                      | Peak type      | Peak position (eV) | Percentage (%) |
|-----------------------------|----------------|--------------------|----------------|
| SnO <sub>x</sub>            | O <sub>L</sub> | 531.15             | 75.89          |
|                             | O <sub>V</sub> | 532.58             | 24.11          |
| 2.5 at% Ce-SnO <sub>x</sub> | O <sub>L</sub> | 530.98             | 80.60          |
|                             | O <sub>V</sub> | 532.43             | 19.40          |

**Table S2.** TRPL parameters of perovskite films deposited on pristine SnO<sub>x</sub> and 2.5 at% Ce-doped SnO<sub>x</sub>.

| Sample                      | A <sub>1</sub> | τ <sub>1</sub> (ns) | A <sub>2</sub> | τ <sub>2</sub> (ns) | τ <sub>ave</sub> (ns) |
|-----------------------------|----------------|---------------------|----------------|---------------------|-----------------------|
| SnO <sub>x</sub>            | 0.46           | 10                  | 0.54           | 188                 | 106                   |
| 2.5 at% Ce-SnO <sub>x</sub> | 0.49           | 9                   | 0.51           | 236                 | 125                   |

**Table S3.** Average (champion) photovoltaic parameters of the devices based on inkjet-printed pristine SnO<sub>x</sub> ETLs and Ce-doped SnO<sub>x</sub> ETLs at various doping levels.

| Ce content | Scan direction | PCE (%)                 | V <sub>OC</sub> (V)   | J <sub>SC</sub> (mA/cm <sup>2</sup> ) | FF (%)                |
|------------|----------------|-------------------------|-----------------------|---------------------------------------|-----------------------|
| pristine   | reverse        | 13.87 ± 0.40<br>(14.66) | 1.05 ± 0.02<br>(1.08) | 21.06 ± 0.28<br>(20.96)               | 62.7 ± 1.3<br>(65.0)  |
|            | forward        | 12.58 ± 0.30<br>(12.97) | 1.02 ± 0.02<br>(1.03) | 21.01 ± 0.20<br>(20.90)               | 58.9 ± 1.6<br>(60.6)  |
| 2.5 at%    | reverse        | 15.05 ± 0.58<br>(15.77) | 1.07 ± 0.01<br>(1.08) | 21.65 ± 0.29<br>(21.98)               | 64.9 ± 1.8<br>(66.4)  |
|            | forward        | 13.21 ± 0.78<br>(12.97) | 1.03 ± 0.01<br>(1.03) | 21.60 ± 0.26<br>(21.96)               | 59.3 ± 2.6<br>(57.6)  |
| 5 at%      | reverse        | 12.61 ± 1.66<br>(14.78) | 1.06 ± 0.03<br>(1.10) | 21.78 ± 0.39<br>(21.89)               | 54.5 ± 5.4<br>(61.7)  |
|            | forward        | 10.52 ± 2.22<br>(11.23) | 0.99 ± 0.09<br>(1.05) | 21.73 ± 0.38<br>(21.76)               | 48.2 ± 6.7<br>(49.1)  |
| 7.5 at%    | reverse        | 12.50 ± 1.66<br>(14.20) | 1.08 ± 0.02<br>(1.05) | 21.11 ± 1.20<br>(21.59)               | 55.0 ± 6.4<br>(62.6)  |
|            | forward        | 8.85 ± 3.16<br>(11.89)  | 1.05 ± 0.02<br>(1.02) | 22.09 ± 0.80<br>(21.76)               | 38.5 ± 14.4<br>(53.6) |
| 10 at%     | reverse        | 12.13 ± 1.00<br>(12.78) | 1.08 ± 0.02<br>(1.08) | 20.14 ± 0.83<br>(20.12)               | 55.7 ± 2.9<br>(59.1)  |
|            | forward        | 6.57 ± 1.72<br>(7.75)   | 1.06 ± 0.01<br>(1.06) | 20.63 ± 0.24<br>(20.48)               | 30.0 ± 7.6<br>(35.7)  |

## References

- [1] Chen, C.; Zhang, W.; Cong, J.; Cheng, M.; Zhang, B.; Chen, H.; Liu, P.; Li, R.; Safdari, M.; Kloo, L.; Sun, L., Cu(II) Complexes as p-Type Dopants in Efficient Perovskite Solar Cells. *ACS Energy Lett.* **2017**, *2* (2), 497-503.
